# Supplementary material for: Integrated Genomic Surveillance reveals extensive onward transmission of travel-imported SARS-CoV-2 infections in the community
Source: bioRxiv or medRxiv preprint supplement (doi:10.1101/2021.10.18.21264530), 2021-10-26
Supplement: Supplementary file [file media-1.pdf]

Tree scale: 0.001

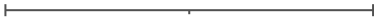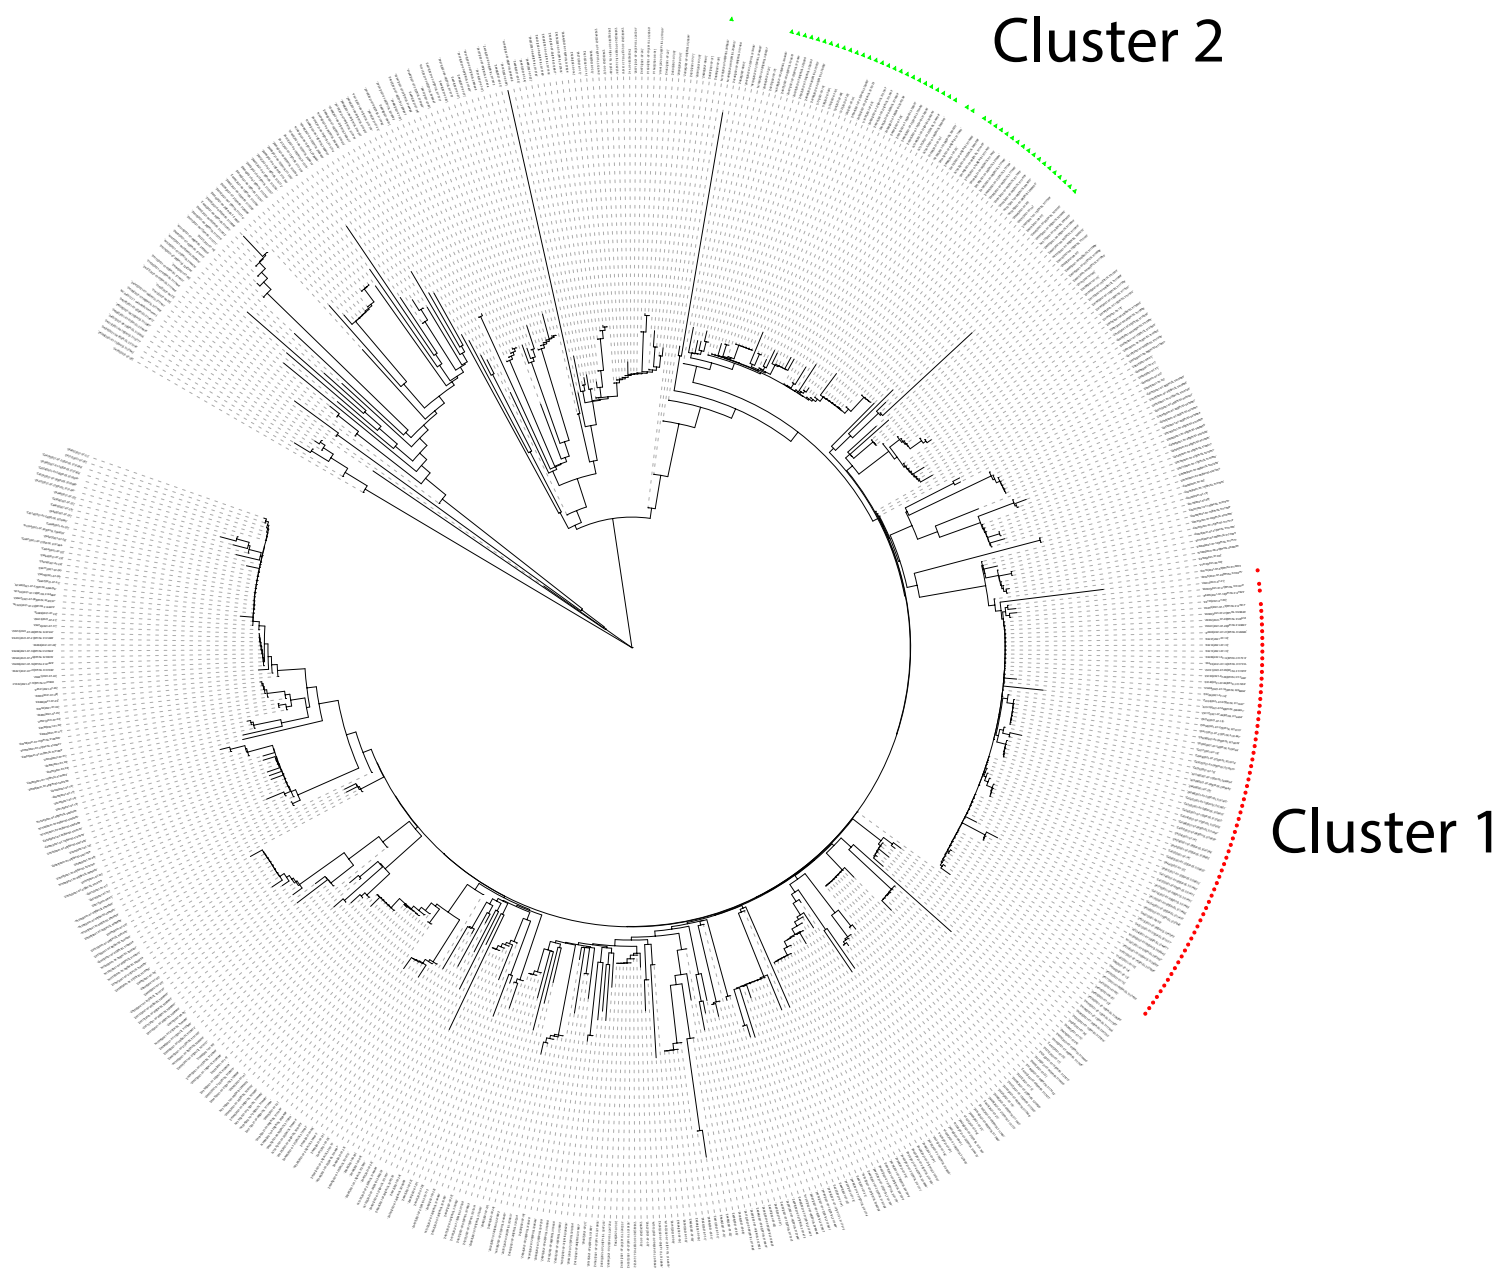

Cluster 2

Cluster 1
